# Supplementary material for: Coumarin–graphene turn-on fluorescent probe for femtomolar level detection of copper(ii)
Source: Royal Society of Chemistry journal article supplement (doi:10.1039/c8nj04732d), 2018-12-03
Supplement: c8nj04732d1.pdf [file c8nj04732d1.pdf]

## Electronic Supplementary Information for New Journal of Chemistry

### Supplementary Information for

#### Coumarin-Graphene Turn-On Fluorescence Probe for Femtomolar Level Detection of Copper (II)

A.K. Akhila<sup>a</sup> and N.K. Renuka<sup>\*a</sup>

Department of Chemistry, University of Calicut,  
Kerala-673635, India.

#### Contents

Figure S1. SEM images of reduced graphene oxide

Figure S2. TEM image of reduced graphene oxide

Figure S3. Probability of fluorescence quenching.

Figure.S4.Comparison of FTIR spectra of pure rGO and rGO-Cu<sup>2+</sup> species.

Figure.S5.UV- Vis absorbance spectra showing slight interaction between Coumarin and Copper ions, which disturbs molecular flattening of the organic molecule on graphene surface.

Fig.S6.FTIR spectra of Coumarin and Coumarin – Cu<sup>2+</sup> system

Fig.S7.FTIR spectra of Coumarin and Coumarin + metal ions except copper

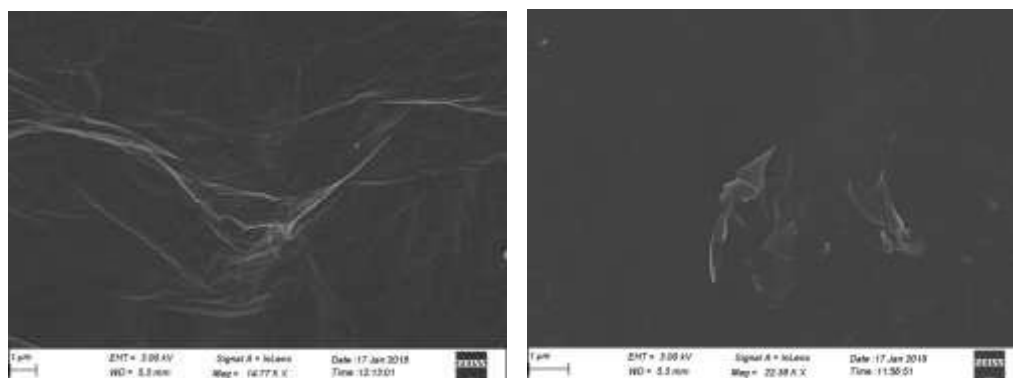

Figure S1. SEM images of reduced graphene oxide

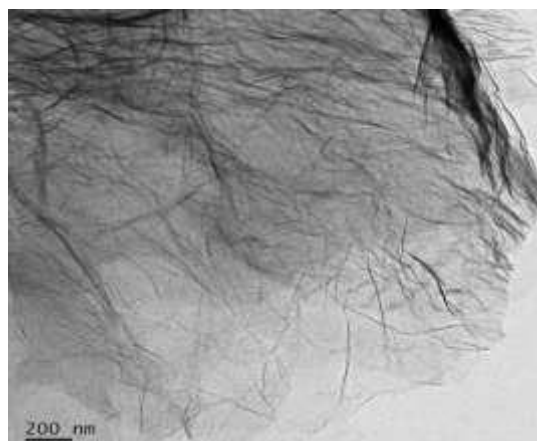

Figure S2. TEM image of reduced graphene oxide

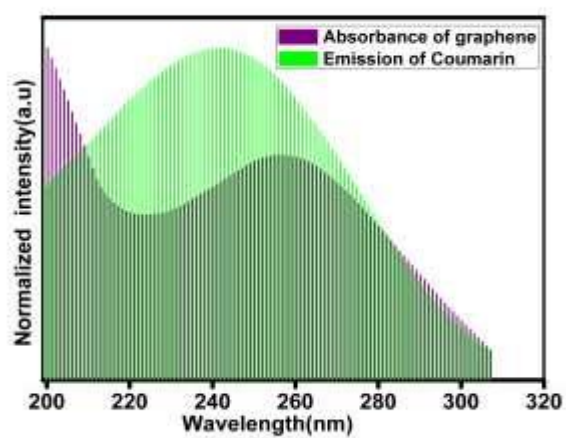

Figure S3. Illustration of probable fluorescence quenching of Coumarin

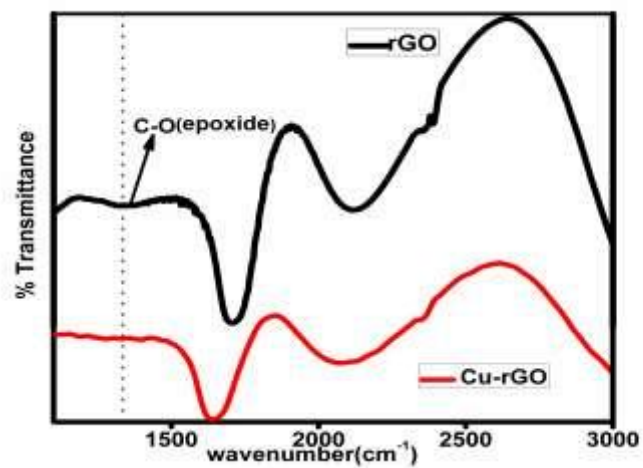

Figure S4. Comparison of FTIR spectra of pure rGO and rGO-Cu<sup>2+</sup> species.

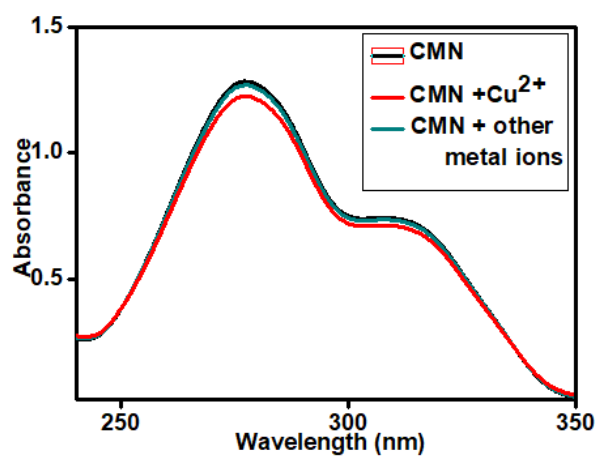

Figure S5. UV- Vis absorbance spectra showing slight interaction between Coumarin and Copper ions, which disturbs molecular flattening of the organic molecule on graphene surface.

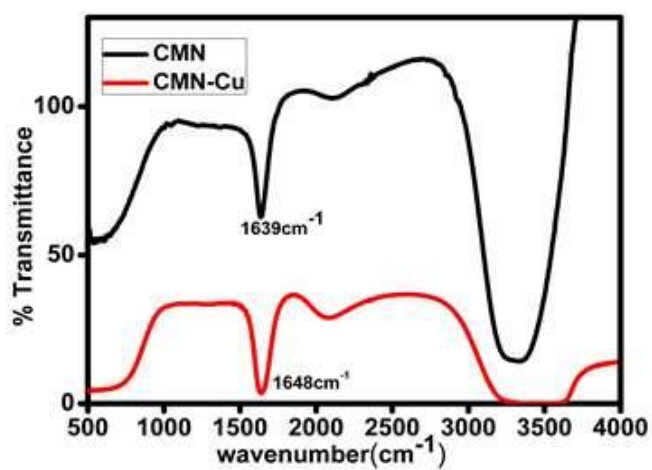

Fig.S6.FTIR spectra of Coumarin and Coumarin – Cu<sup>2+</sup> system

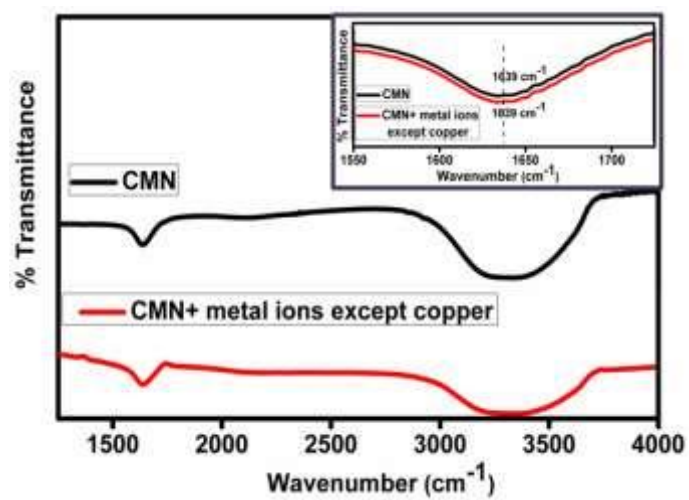

Fig.S7.FTIR spectra of Coumarin and Coumarin with metal ions except copper [Carbonyl band (inset)].
